### 216 Fix or Replace: Is Internal Fixation Still A Viable Option in The Elderly with Un-Displaced Intracapsular Femoral Neck Fractures?

R. Morris, A. Krishna, H. Hamid, M. Chawda, H. Mumtaz  
*Ysbyty Gwynedd, Bangor, United Kingdom*

**Aim:** The treatment of impacted or un-displaced femoral neck fractures in the elderly osteoporotic patient is still largely debated, with arthroplasty versus internal fixation two surgical options<sup>1</sup>. Our aim was to retrospectively review patients over the age of 80 with un-displaced intracapsular hip fractures who had undergone internal fixation and assess their rate of mortality and revision surgery.

**Method:** We conducted a retrospective review of all patients with femoral neck fractures over a 4-year period between January 2015 to December 2018. We refined this to only patients over the age of 80 with un-displaced intracapsular femoral neck fractures fixed with cannulated screws. We noted their mental and mobility status, their follow-up attendance over 3 years, their mortality and rate of revision surgery.

**Results:** There were a total of 1232 femoral neck fractures in a 4-year period. Of these, 37 were >80 with un-displaced intracapsular femoral neck fractures, with 23 fixed with cannulated screws and 14 with a Dynamic Hip Screw. Mean age – 85, M:F (1:4.75). All patients were either Garden Classification Type I or II. 4% had cognitive impairment. All patients were independently mobile. 83% were followed up for 3 years, with 1 patient (4%) undergoing revision surgery 3 years following cannulated screw fixation. The 30-day mortality rate was 5%.

**Conclusions:** The treatment choice for un-displaced intracapsular femoral neck fractures in the elderly remains debateable. Our retrospective review shows that the rate of re-operation is low in patients who have undergone fixation with cannulated screws and so this remains a viable option.
